# Supplementary material for: Precursor template synthesis of three-dimensional mesoporous ZnO hierarchical structures and their photocatalytic properties
Source: Royal Society of Chemistry journal article supplement (doi:10.1039/b924097g), 2010-01-01
Supplement: b924097g.pdf [file b924097g.pdf]

Electronic Supplementary Information (ESI)

Table 1 experimental details for samples **S1-S10**.

|            | Urea<br>(mol) | Zn(NO <sub>3</sub> ) <sub>2</sub><br>(mol) | Annealing temperature<br>(°C) |
|------------|---------------|--------------------------------------------|-------------------------------|
| <b>S1</b>  | 0.002         | 0.002                                      | As prepared                   |
| <b>S2</b>  | 0.006         | 0.002                                      | As prepared                   |
| <b>S3</b>  | 0.015         | 0.002                                      | As prepared                   |
| <b>S4</b>  | 0.02          | 0.002                                      | As prepared                   |
| <b>S5</b>  | 0.02          | 0.002                                      | 300                           |
| <b>S6</b>  | 0.02          | 0.002                                      | 400                           |
| <b>S7</b>  | 0.02          | 0.002                                      | 500                           |
| <b>S8</b>  | 0.006         | 0.002                                      | 300                           |
| <b>S9</b>  | 0.006         | 0.002                                      | 400                           |
| <b>S10</b> | 0.006         | 0.002                                      | 500                           |
